# Supplementary material for: Metaproteomic Analysis of the Anaerobic Community Involved in the Co-Digestion of Residues from Sugarcane Ethanol Production for Biogas Generation
Source: MDPI journal article supplement (doi:10.3390/biomass2040024), 2022-12-05
Supplement: s1 [file s1]

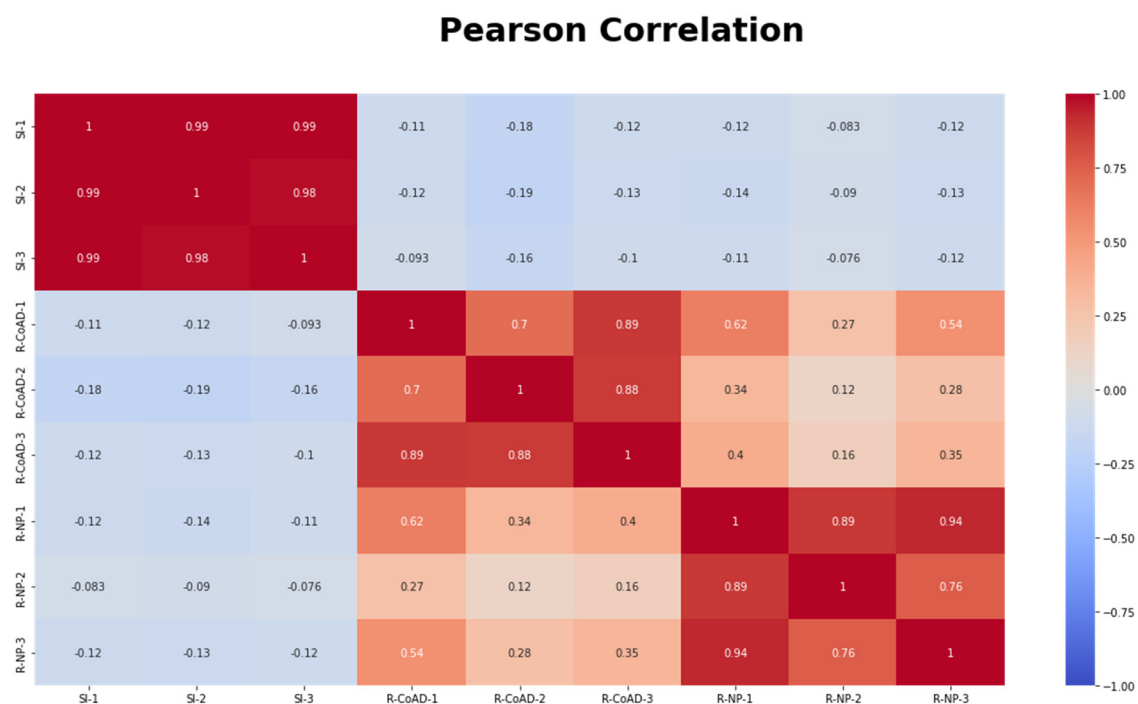

**Figure S1.** Heatmap with Pearson correlation coefficients among SI, R-CoAD and RN samples. All positive correlations are shown in red and negative correlations are shown in blue. The numbers inside the square represent the correlation values.

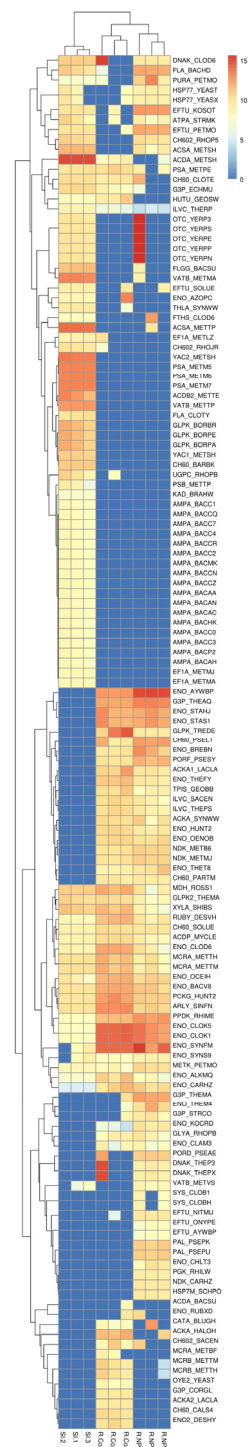

**Figure S2.** Hierarchical clustering analysis of the abundance profiles of the identified 139 proteins with ID of protein.

**Table S1.** Proteins that were differentially abundant between samples SI and R-NP.

| ID protein from UNIPROT | Protein Description | significance value |
|-------------------------|---------------------|--------------------|
| ACDA_METSH              |                     | 0.00               |
| ENO_CLOK5               | Enolase             | 0.00               |
| ENO_CLOK1               | Enolase             | 0.00               |
| ENO_CLOD6               | Enolase             | 0.04               |
| ENO_RUMCH               | Enolase             | 0.00               |
| GLPK2_THEMA             | Glycerol kinase 2   | 0.34               |
| ENO_OCEIH               | Enolase             | 0.38               |
| CH60_CLOTE              | 60 kDa chaperonin   | 0.12               |

|             |                             |      |
|-------------|-----------------------------|------|
| RUBY_DESVH  | Rubrerythrin                | 0.01 |
| PPDK_RICFE  | Pyruvate phosphate dikinase | 0.27 |
| PPDK_RHIME  |                             | 0.00 |
| PPDK_RICPR  |                             | 0.00 |
| PPDK_RICCN  | Pyruvate phosphate dikinase | 0.01 |
| PPDK_RICBR  | Pyruvate phosphate dikinase | 0.01 |
| PPDK_RICTY  | Pyruvate phosphate dikinase | 0.01 |
| ENO_THEAB   | Enolase                     | 0.17 |
| PSA_METB6   | Proteasome subunit alpha    | 0.06 |
| PSA_METPE   | Proteasome subunit alpha    | 0.12 |
| PSA_METMJ   | Proteasome subunit alpha    | 0.10 |
| ARLY_SINFN  | Argininosuccinate lyase     | 0.00 |
| ARLY1_RHIME | Argininosuccinate lyase 1   | 0.00 |
| ARLY_RHIE6  | Argininosuccinate lyase     | 0.00 |

**Table S2.** Proteins that were differentially abundant between samples SI and R-CoAD.

| ID protein from UNIPROT | Protein Description                                                                 | Significance value |
|-------------------------|-------------------------------------------------------------------------------------|--------------------|
| FLA_BACHD               |                                                                                     | 0.04               |
| ENO_CLOK5               | Enolase                                                                             | 0.03               |
| ENO_CLOK1               | Enolase                                                                             | 0.03               |
| CH603_BRADU             | 60 kDa chaperonin 3                                                                 | 0.36               |
| CH602_RHOPA             | 60 kDa chaperonin 2                                                                 | 0.36               |
| CH602_RHOP5             | 60 kDa chaperonin 2                                                                 | 0.21               |
| CH606_BRADU             | 60 kDa chaperonin 6                                                                 | 0.36               |
| CH602_NITHX             | 60 kDa chaperonin 2                                                                 | 0.36               |
| ENO_BACV8               | Enolase                                                                             | 0.05               |
| ENO_RUMCH               | Enolase                                                                             | 0.05               |
| ENO_BACTN               | Enolase                                                                             | 0.05               |
| ENO_BACFR               | Enolase                                                                             | 0.05               |
| ENO_BACFN               | Enolase                                                                             | 0.05               |
| UGPC_BARBK              | sn-glycerol-3-phosphate import ATP-binding protein UgpC OS=Bartonella bacilliformis | 0.00               |
| RUBY_DESVH              | Rubrerythrin                                                                        | 0.14               |
| PPDK_CLOSY              |                                                                                     | 0.00               |
| PPDK_RICFE              | Pyruvate phosphate dikinase OX=315456 GN=ppdK PE=3 SV=1                             | 0.08               |
| PPDK_RHIME              |                                                                                     | 0.00               |
| PPDK_RICPR              |                                                                                     | 0.00               |
| PPDK_RICCN              | Pyruvate phosphate dikinase                                                         | 0.00               |
| PPDK_RICBR              | Pyruvate phosphate dikinase                                                         | 0.00               |
| PPDK_RICTY              | Pyruvate phosphate dikinase                                                         | 0.00               |
| VATB_METPE              | V-type ATP synthase beta chain                                                      | 0.00               |
| ENO_SYNSC               | Enolase                                                                             | 0.15               |
| ENO_THEAB               | Enolase                                                                             | 0.00               |
| ATPA_DECAR              | ATP synthase subunit alpha                                                          | 0.06               |
| ARLY_SINFN              | Argininosuccinate lyase                                                             | 0.02               |
| ARLY1_RHIME             | Argininosuccinate lyase 1                                                           | 0.03               |
| ARLY_RHIE6              | Argininosuccinate lyase                                                             | 0.03               |

**Table S3.** Proteins that were differentially abundant between samples R-NP and R-CoAD.

| ID Protein from UNIPROT | Protein Description                 | Significance value |
|-------------------------|-------------------------------------|--------------------|
| ENO_CLOK5               | Enolase OS=Clostridium kluyveri     | 0.10               |
| ENO_CLOK1               | Enolase OS=Clostridium kluyveri     | 0.10               |
| ENO_CLOD6               | Enolase OS=Clostridioides difficile | 0.07               |
| ENO_HUNT2               | Enolase                             | 0.13               |
| CH60_PSELT              | 60 kDa chaperonin                   | 0.16               |
| CH60_FERNB              | 60 kDa chaperonin                   | 0.18               |

|             |                                             |      |
|-------------|---------------------------------------------|------|
| CH60_THEAB  | 60 kDa chaperonin                           | 0.01 |
| CH60_THENE  | 60 kDa chaperonin                           | 0.01 |
| CH60_THEM4  | 60 kDa chaperonin                           | 0.01 |
| CH60_THEMA  | 60 kDa chaperonin                           | 0.01 |
| CH60_THEP1  | 60 kDa chaperonin                           | 0.01 |
| CH60_THESQ  | 60 kDa chaperonin                           | 0.01 |
| ENO_THEFY   | Enolase OS=Thermobifida fusca               | 0.19 |
| ENO_BREBN   | Enolase OS=Brevibacillus brevis             | 0.10 |
| ENO_AYWBP   | Enolase OS                                  | 0.00 |
| ACKA1_LACLA |                                             | 0.11 |
| MCRA_METTH  |                                             | 0.04 |
| MCRA_METTM  |                                             | 0.04 |
| ACDP_MYCLE  | Probable acyl-CoA dehydrogenase<br>fadE25   | 0.14 |
| ACDP_MYCBO  | Probable acyl-CoA dehydrogenase<br>fadE25   | 0.26 |
| ACDP_MYCTU  | Probable acyl-CoA dehydrogenase<br>fadE25   | 0.26 |
| ACDP_MYCTO  | Probable acyl-CoA dehydrogenase<br>fadE25   | 0.26 |
| ENO_RUMCH   | Enolase                                     | 0.04 |
| ENO_OCEIH   | Enolase                                     | 0.02 |
| G3P_THEAQ   | Glyceraldehyde-3-phosphate<br>dehydrogenase | 0.00 |
| ENO_LACF3   | Enolase OS=Lactobacillus<br>fermentum       | 0.31 |
| ENO_LACCB   | Enolase OS=Lactobacillus casei              | 0.08 |
| ENO_OENOB   | Enolase                                     | 0.18 |
| ENO_PEDPA   | Enolase                                     | 0.05 |
| ENO_LACP3   | Enolase                                     | 0.05 |
| ENO2_LACGA  | Enolase 2                                   | 0.05 |
| ENO_PELCD   | Enolase                                     | 0.32 |
| ENO1_LACJO  | Enolase 1                                   | 0.05 |
| ENO_LACS1   | Enolase                                     | 0.05 |
| ENO_LACSS   | Enolase                                     | 0.05 |
| ILVC_SACEN  | Ketol-acid reductoisomerase<br>(NADP (+))   | 0.08 |
| ILVC_THEPS  | Ketol-acid reductoisomerase<br>(NAD (+))    | 0.02 |
| RUBY_DESVH  | Rubryerythrin                               | 0.01 |
| CH60_SOLUE  | 60 kDa chaperonin                           | 0.06 |
| PPDK_CLOSY  |                                             | 0.32 |
| PPDK_RICFE  | Pyruvate phosphate dikinase                 | 0.01 |
| PPDK_RHIME  |                                             | 0.01 |
| PPDK_RICPR  |                                             | 0.08 |
| PPDK_RICCN  | Pyruvate phosphate dikinase                 | 0.08 |
| PPDK_RICBR  | Pyruvate phosphate dikinase                 | 0.00 |
| PPDK_RICTY  | Pyruvate phosphate dikinase                 | 0.08 |
| PORF_PSESY  | Outer membrane porin F                      | 0.03 |
| ENO_THET8   | Enolase                                     | 0.16 |
| ENO_THET2   | Enolase                                     | 0.16 |
| GLYA_RHOP2  | Serine hydroxymethyltransferase             | 0.14 |
| ARLY_SINFN  | Argininosuccinate lyase                     | 0.01 |
| ARLY1_RHIME | Argininosuccinate lyase 1                   | 0.01 |
| ARLY_RHIE6  | Argininosuccinate lyase                     | 0.01 |

**Table S4.** Relative abundance of identified proteins assigned to Bacterial and Archaea genera in each sample.

| Genus               | SI    | R-NP  | R-CoAD |
|---------------------|-------|-------|--------|
| Acidovorax          | 0.18  | 0.10  | 0.10   |
| Ajellomyces         | 0.00  | 0.06  | 0.00   |
| Alkalilimnicola     | 0.18  | 0.05  | 0.05   |
| Alkaliphilus        | 4.16  | 0.69  | 0.24   |
| Amoebophilus        | 0.00  | 0.13  | 0.07   |
| Aspergillus         | 0.09  | 0.11  | 0.00   |
| Aster               | 0.00  | 1.11  | 4.46   |
| Azobacteroides      | 0.08  | 1.81  | 0.12   |
| Bacillus            | 2.07  | 0.07  | 0.71   |
| Bacteroides         | 0.91  | 3.01  | 1.16   |
| Bartonella          | 0.71  | 0.00  | 1.56   |
| Bifidobacterium     | 0.18  | 0.04  | 0.07   |
| Blumeria            | 0.00  | 0.05  | 0.95   |
| Bordetella          | 2.37  | 0.34  | 0.00   |
| Brachyspira         | 0.04  | 0.00  | 0.00   |
| Bradyrhizobium      | 0.55  | 0.18  | 0.34   |
| Brevibacillus       | 4.27  | 0.16  | 0.71   |
| Burkholderia        | 1.79  | 0.51  | 0.31   |
| Caldanaerobacter    | 0.00  | 5.69  | 0.08   |
| Calycanthus         | 0.18  | 0.05  | 0.03   |
| Carboxydotherrmus   | 0.01  | 0.36  | 0.34   |
| Chelativorans       | 0.00  | 0.13  | 0.11   |
| Chloroherpeton      | 0.00  | 0.00  | 0.11   |
| Clavibacter         | 0.00  | 0.06  | 0.04   |
| Clostridioides      | 0.57  | 6.97  | 1.06   |
| Clostridium         | 0.70  | 10.94 | 5.08   |
| Corynebacterium     | 0.00  | 0.14  | 0.00   |
| Dechloromonas       | 0.27  | 0.05  | 0.04   |
| Desulfitobacterium  | 0.00  | 0.21  | 0.00   |
| Desulfovibrio       | 0.07  | 0.59  | 0.31   |
| Echinococcus        | 0.33  | 0.06  | 0.02   |
| Erwinia             | 0.17  | 0.00  | 0.00   |
| Escherichia         | 0.86  | 0.10  | 0.05   |
| Fervidobacterium    | 0.00  | 0.37  | 2.33   |
| Finegoldia          | 0.00  | 0.02  | 0.06   |
| Geobacillus         | 0.06  | 0.33  | 0.65   |
| Geobacter           | 0.00  | 0.34  | 0.57   |
| Halotheomothrix     | 0.00  | 0.58  | 0.24   |
| Hungateiclostridium | 0.19  | 1.45  | 0.47   |
| Kluyveromyces       | 0.00  | 0.59  | 0.76   |
| Kocuria             | 0.00  | 0.01  | 0.12   |
| Kosmotoga           | 0.23  | 0.07  | 0.89   |
| Lactobacillus       | 0.00  | 1.84  | 1.28   |
| Lactococcus         | 0.00  | 0.73  | 0.13   |
| Mannheimia          | 0.18  | 0.05  | 0.05   |
| Mesorhizobium       | 0.12  | 0.00  | 0.00   |
| Methanobrevibacter  | 1.09  | 0.00  | 0.00   |
| Methanocaldococcus  | 1.11  | 0.03  | 0.00   |
| Methanocella        | 0.02  | 0.00  | 0.01   |
| Methanococcoides    | 2.11  | 0.00  | 0.00   |
| Methanococcus       | 8.84  | 0.00  | 0.37   |
| Methanocorpusculum  | 2.19  | 0.21  | 0.00   |
| Methanoculleus      | 0.28  | 0.44  | 0.29   |
| Methanoregula       | 0.21  | 0.46  | 0.29   |
| Methanosarcina      | 14.23 | 0.05  | 0.32   |

---

|                     |       |       |      |
|---------------------|-------|-------|------|
| Methanosphaerula    | 2.30  | 0.31  | 0.19 |
| Methanospirillum    | 0.00  | 0.04  | 0.07 |
| Methanothermobacter | 1.61  | 1.56  | 0.22 |
| Methanothrix        | 14.36 | 0.07  | 0.23 |
| Methylococcus       | 0.18  | 0.03  | 0.03 |
| Moorella            | 0.15  | 0.07  | 0.10 |
| Mycobacterium       | 1.84  | 1.01  | 0.36 |
| Neosartorya         | 0.07  | 0.05  | 0.00 |
| <b>Nitrobacter</b>  | 0.22  | 0.00  | 0.17 |
| <b>Nitrosomonas</b> | 0.18  | 0.04  | 0.03 |
| Nitrospira          | 0.00  | 0.01  | 0.11 |
| Oceanobacillus      | 0.12  | 0.64  | 0.25 |
| Oenococcus          | 0.00  | 0.28  | 0.19 |
| Onion               | 0.00  | 0.00  | 0.03 |
| Ostreococcus        | 0.18  | 0.05  | 0.03 |
| Paraburkholderia    | 0.18  | 0.05  | 0.03 |
| Parageobacillus     | 0.00  | 0.13  | 0.10 |
| Pectobacterium      | 0.81  | 0.92  | 0.05 |
| Pediococcus         | 0.22  | 0.26  | 0.18 |
| Pelobacter          | 0.00  | 0.27  | 0.32 |
| Petrotoga           | 0.34  | 0.12  | 1.59 |
| Photorhabdus        | 0.00  | 0.30  | 0.00 |
| Polynucleobacter    | 0.36  | 0.10  | 0.06 |
| Prochlorococcus     | 0.00  | 0.04  | 0.08 |
| Pseudomonas         | 0.00  | 1.08  | 1.36 |
| Pseudothromotoga    | 0.00  | 0.34  | 0.79 |
| Ralstonia           | 0.36  | 0.10  | 0.06 |
| Rhizobium           | 0.73  | 3.36  | 1.65 |
| Rhodococcus         | 0.22  | 0.03  | 0.00 |
| Rhodopseudomonas    | 1.80  | 0.36  | 0.82 |
| Rickettsia          | 0.76  | 2.46  | 4.51 |
| Roseiflexus         | 0.42  | 0.72  | 0.09 |
| Rubrobacter         | 0.00  | 0.14  | 0.22 |
| Ruminiclostridium   | 0.23  | 0.76  | 0.29 |
| Saccharomyces       | 0.26  | 0.25  | 0.26 |
| Saccharopolyspora   | 0.00  | 0.43  | 0.36 |
| Salmonella          | 6.43  | 6.01  | 0.30 |
| Schizosaccharomyces | 0.00  | 0.00  | 0.10 |
| Serratia            | 0.18  | 0.46  | 0.02 |
| Shigella            | 2.27  | 1.54  | 0.13 |
| Sinorhizobium       | 0.23  | 1.43  | 0.25 |
| Solibacter          | 0.21  | 0.37  | 0.22 |
| Staphylococcus      | 1.73  | 2.16  | 1.47 |
| Stenotrophomonas    | 0.43  | 0.10  | 0.12 |
| Streptococcus       | 0.18  | 0.05  | 0.03 |
| Streptomyces        | 0.00  | 0.08  | 0.10 |
| Synechococcus       | 0.69  | 0.30  | 0.69 |
| Syntrophobacter     | 0.07  | 2.97  | 3.21 |
| Syntrophomonas      | 0.15  | 0.27  | 0.18 |
| Thermacetogenium    | 0.00  | 0.26  | 0.08 |
| Thermoanaerobacter  | 0.00  | 10.68 | 0.17 |
| Thermobifida        | 0.00  | 0.44  | 0.10 |
| Thermomicrobium     | 0.09  | 0.02  | 0.00 |
| Thermosipho         | 0.47  | 5.56  | 4.98 |
| Thermotoga          | 0.36  | 1.02  | 4.95 |
| Thermus             | 0.00  | 1.00  | 1.82 |
| Thiobacillus        | 0.27  | 0.08  | 0.03 |
| Treponema           | 0.00  | 2.15  | 0.11 |
| Xanthobacter        | 0.18  | 0.05  | 0.03 |

---

|             |      |      |       |
|-------------|------|------|-------|
| Xanthomonas | 1.44 | 0.41 | 0.25  |
| Xylella     | 0.18 | 0.05 | 0.03  |
| Yarrowia    | 0.18 | 0.05 | 0.03  |
| Yersinia    | 4.57 | 4.72 | 38.74 |
| Zymomonas   | 0.18 | 0.05 | 0.03  |

---
